# Supplementary material for: A space-efficient and accurate method for mapping and aligning cDNA sequences onto genomic sequence
Source: PubMed Central journal article supplement — Nucleic Acids Res. 2008 Mar 15;36(8):2630–8. doi: 10.1093/nar/gkn105 (PMC2377433; doi:10.1093/nar/gkn105), 2008-03-15
Supplement: nar_gkn105_1.pdf [file nar_gkn105_1.pdf]

## Supplementary Tables

**Table S1.** Alignment near exon-intron boundaries at which the results of *Spaln* differ from Projector annotations

| Projector ID                | Alignment                                                                                   |
|-----------------------------|---------------------------------------------------------------------------------------------|
| Hs.1.ENST<br>00000271555.2  | AGCCGGGCTG <u>g</u> tgagtagag ccctttccag-GAGGCTGTGC<br>AGCCGGGCTG.....GGAGGCTGTGC           |
| Hs.13.ENST<br>00000316546.1 | GAAGGCGCAG <u>g</u> tggggcgcg aattttgcag-AAATGGAGCA<br>GAAGGCGCAG.....GAAATGGAGCA           |
| Hs.17.ENST<br>00000225740.1 | TGTGTCAAAG <u>g</u> taatcctct ctgtccccag-GCGCCATGAG<br>TGTGTCAAAG.....GGCGCCATGAG           |
| Hs.7.ENST<br>00000289604.1  | AGCATTTTAA <u>g</u> tatggggaa tctcctccag-AATCCAGAAA<br>AGCATTTTAA.....GAATCCAGAAA           |
| Hs.7.ENST<br>00000289604.1  | GTTCTTAAAG <u>g</u> tagtgtaca tccatacag-GCTCAAGAAT<br>GTTCTTAAAG.....GGCTCAAGAAT            |
| Hs.8.ENST<br>00000323173.1  | TGGACTGCAC <u>g</u> taagtagaa cttttctcag-GTTGGTGACA<br>TGGACTGCAC.....GTTGGTGACA            |
| Hs.20.ENST<br>00000201955.1 | AAACTTTT <u>g</u> AGgtgagatgtg ttttgtttag-GTCCTGGGAG<br>AAACTTTT <u>g</u> AG.....GTCCTGGGAG |
| Hs.20.ENST<br>00000201955.1 | TCTTAAGCAG <u>g</u> tctgttgat ttgttttag-AATTTTGATT<br>TCTTAAGCAG.....GAATTTTGATT            |
| Hs.20.ENST<br>00000201955.1 | AGAGATTTT <u>g</u> Ggtgagtgaaa ctcttttcag-AAGTTTTCTT<br>AGAGATTTT <u>g</u> .....GAAGTTTTCTT |
| Hs.1.ENST<br>00000295314.1  | CACAGGGGAG <u>g</u> tgagaaggg tgttgcccag-GCTCTGTGAG<br>CACAGGGGAG.....GGCTCTGTGAG           |
| Hs.22.ENST<br>00000215792.1 | CCCCTACTCT <u>g</u> tcatctcag agtcactcag-GAACACCCTC<br>CCCCTACTCT.....GGAACACCCTC           |
| Hs.2.ENST<br>00000233767.1  | TGCGCGCAG <u>g</u> tgagtggcc cttttcgcag-AAAGTTTCAT<br>TGCGCGCAGA.....GAAAGTTTCAT            |
| Hs.2.ENST<br>00000233767.1  | AAGGTGGCAG <u>g</u> tcagtaaat ttccctatag-GATGTCTCAG<br>AAGGTGGCAG.....GGATGTCTCAG           |

The upper and lower lines in each alignment indicate the genomic sequence and the cDNA sequence, respectively. Introns inferred by *Spaln* are shown in lower-case letters, whereas exons and cDNA sequences are shown in upper-case letters. The consensus dinucleotides at the ends of introns are underlined. In each case, the Projector annotation assigns the “g” at the 3’ end of intron to a part of the following exon.

**Table S2.** Default parameter values of *Spaln* and *SpalnX*

| Parameter                                                                | Command Line Option | Value        |               |
|--------------------------------------------------------------------------|---------------------|--------------|---------------|
|                                                                          |                     | <i>Spaln</i> | <i>SpalnX</i> |
| Nucleotide Match                                                         | -ym                 | 2            | 2             |
| Nucleotide Mismatch                                                      | -yn                 | -6           | -2            |
| Gap open penalty                                                         | -v                  | 8            | 6             |
| Gap extension penalty                                                    | -u                  | 3            | 2             |
| Factor given to an exon-boundary signal relative to sequence match score | -yy                 | 4            | 4             |
| Intron penalty                                                           | -yi                 | 28           | 33            |
| Minimum intron length                                                    | -yL                 | 30           | 30            |

**Table S3.** Commonality among genomic loci detected by different methods

| Methods | Common | Union  | %     |
|---------|--------|--------|-------|
| B-G     | 122981 | 124255 | 98.90 |
| B-M     | 118345 | 124282 | 95.17 |
| G-M     | 117621 | 124213 | 94.58 |
| B-S     | 123402 | 124308 | 99.23 |
| G-S     | 122689 | 124254 | 98.66 |
| M-S     | 118167 | 124282 | 95.02 |
| B-G-M   | 117341 | 124305 | 94.36 |
| B-G-S   | 122401 | 124316 | 98.43 |
| B-M-S   | 117811 | 124322 | 94.74 |
| G-M-S   | 117198 | 124305 | 94.24 |
| B-G-M-S | 116941 | 124325 | 94.04 |

The second column indicates the number of queries that were commonly mapped by the methods shown in the first column, and the third column indicates the cardinality of their union. The fourth column indicates the percentage of commonly mapped queries of the 124355 total cDNAs examined. The methods used for mapping, *Blat*, *Gmap*, *Megablast*, and *Spaln*, are abbreviated by their initials.

**Table S4.** Error rates at the gene level in alignment between cDNA sequences and corresponding genomic segments

| Noise (%) | Method      |               |                  |             |              |             |              |               |               |               |                |
|-----------|-------------|---------------|------------------|-------------|--------------|-------------|--------------|---------------|---------------|---------------|----------------|
|           | <i>Blat</i> | <i>Exalin</i> | <i>Exonerate</i> | <i>Gmap</i> | <i>GmapX</i> | <i>Sim4</i> | <i>Spaln</i> | <i>SpalnA</i> | <i>SpalnS</i> | <i>SpalnX</i> | <i>SpalnXL</i> |
| 0         | 6.13        | 2.15          | 2.66             | 2.15        | 0.72         | 2.04        | 0.41         | 0.41          | 2.86          | 0.51          | 0.51           |
|           | 0.00        | 0.00          | 0.00             | 0.00        | 0.00         | 0.00        | 0.00         | 0.00          | 0.00          | 0.00          | 0.00           |
| 1         | 12.24       | 2.71          | 3.39             | 0.84        | 0.70         | 3.53        | 0.60         | 0.60          | 2.92          | 0.70          | 0.70           |
|           | 0.81        | 1.13          | 1.56             | 0.46        | 0.38         | 0.81        | 0.31         | 0.31          | 0.06          | 0.31          | 0.31           |
| 2         | 20.25       | 3.39          | 3.63             | 1.91        | 1.77         | 5.11        | 0.59         | 0.70          | 2.90          | 0.72          | 1.04           |
|           | 1.91        | 1.61          | 0.67             | 2.18        | 2.18         | 0.74        | 0.10         | 0.10          | 0.06          | 0.13          | 0.85           |
| 4         | 36.16       | 6.10          | 6.94             | 4.86        | 4.45         | 14.54       | 1.70         | 2.13          | 3.22          | 1.86          | 2.22           |
|           | 3.13        | 2.22          | 0.69             | 4.03        | 4.00         | 2.46        | 0.78         | 0.89          | 0.28          | 0.63          | 0.85           |
| 6         | 52.03       | 15.49         | 12.20            | 7.47        | 6.92         | 21.01       | 2.66         | 3.34          | 3.41          | 2.68          | 6.10           |
|           | 4.57        | 6.03          | 4.26             | 2.76        | 2.71         | 2.15        | 1.45         | 1.39          | 0.27          | 1.09          | 3.61           |
| 8         | 66.17       | 21.30         | 18.36            | 14.95       | 14.22        | 34.00       | 4.25         | 5.13          | 4.17          | 4.21          | 7.65           |
|           | 2.97        | 7.00          | 6.19             | 5.40        | 5.40         | 4.62        | 1.97         | 2.13          | 1.59          | 1.85          | 2.30           |
| 10        | 78.66       | 27.25         | 23.59            | 20.01       | 18.92        | 49.37       | 5.73         | 7.09          | 3.94          | 5.15          | 8.89           |
|           | 4.47        | 9.07          | 5.16             | 6.00        | 6.08         | 4.36        | 2.20         | 2.74          | 0.35          | 1.58          | 3.72           |

Presented are the percentages of incorrectly identified gene structures of the total of 978 human and mouse genes in Projector database under various levels of artificially introduced noise. Each cell indicates the average (upper line) and the standard deviation (lower line) of six experiments.

**Table S5.** Error rates at the exon level in alignment between cDNA sequences and corresponding genomic segments

| Noise (%) | Methods     |               |                  |             |              |             |              |               |               |               |                |
|-----------|-------------|---------------|------------------|-------------|--------------|-------------|--------------|---------------|---------------|---------------|----------------|
|           | <i>Blat</i> | <i>Exalin</i> | <i>Exonerate</i> | <i>Gmap</i> | <i>GmapX</i> | <i>Sim4</i> | <i>Spaln</i> | <i>SpalnA</i> | <i>SpalnS</i> | <i>SpalnX</i> | <i>SpalnXL</i> |
| 0         | 2.74        | 0.42          | 0.44             | 0.43        | 0.19         | 0.45        | 0.14         | 0.13          | 0.62          | 0.14          | 0.14           |
|           | 0.00        | 0.00          | 0.00             | 0.00        | 0.00         | 0.00        | 0.00         | 0.00          | 0.00          | 0.00          | 0.00           |
| 1         | 4.21        | 0.50          | 0.69             | 0.22        | 0.18         | 0.75        | 0.17         | 0.16          | 0.63          | 0.17          | 0.17           |
|           | 0.26        | 0.17          | 0.60             | 0.07        | 0.05         | 0.14        | 0.04         | 0.05          | 0.01          | 0.04          | 0.04           |
| 2         | 5.82        | 0.57          | 0.62             | 0.33        | 0.30         | 1.06        | 0.16         | 0.17          | 0.63          | 0.17          | 0.21           |
|           | 0.34        | 0.18          | 0.16             | 0.23        | 0.24         | 0.15        | 0.02         | 0.02          | 0.02          | 0.01          | 0.09           |
| 4         | 10.45       | 0.89          | 1.16             | 0.80        | 0.69         | 2.83        | 0.31         | 0.39          | 0.68          | 0.33          | 0.38           |
|           | 0.78        | 0.26          | 0.18             | 0.56        | 0.54         | 0.42        | 0.11         | 0.15          | 0.05          | 0.08          | 0.12           |
| 6         | 15.75       | 2.06          | 2.22             | 1.17        | 1.03         | 4.33        | 0.50         | 0.62          | 0.72          | 0.46          | 0.83           |
|           | 1.14        | 0.69          | 0.76             | 0.37        | 0.34         | 0.39        | 0.22         | 0.24          | 0.02          | 0.13          | 0.42           |
| 8         | 22.63       | 2.85          | 3.92             | 2.27        | 2.06         | 7.35        | 0.69         | 0.85          | 0.81          | 0.64          | 1.02           |
|           | 1.71        | 0.96          | 1.51             | 0.62        | 0.62         | 0.90        | 0.24         | 0.27          | 0.19          | 0.21          | 0.25           |
| 10        | 31.70       | 3.58          | 5.55             | 3.22        | 2.92         | 12.13       | 0.92         | 1.22          | 0.80          | 0.78          | 1.20           |
|           | 1.89        | 1.23          | 1.70             | 0.78        | 0.76         | 0.93        | 0.29         | 0.48          | 0.05          | 0.23          | 0.44           |

Presented are the percentages of erroneously identified exons in alignment between 978 pairs of cDNA and genomic segments in Projector database under various levels of artificially introduced noise. Each error rate was obtained by the formula:  $100 - 200C / (T + P)$ , where  $C$ ,  $T$  and  $P$  denote the total numbers of correctly identified exons, true exons, and predicted exons, respectively. Each cell indicates the average (upper line) and the standard deviation (lower line) of six experiments.

**Table S6.** Error rates at assigning internal exons in alignment between cDNA sequences and corresponding genomic segments

| Noise (%) | Methods     |               |                  |             |              |             |              |               |               |               |                |
|-----------|-------------|---------------|------------------|-------------|--------------|-------------|--------------|---------------|---------------|---------------|----------------|
|           | <i>Blat</i> | <i>Exalin</i> | <i>Exonerate</i> | <i>Gmap</i> | <i>GmapX</i> | <i>Sim4</i> | <i>Spaln</i> | <i>SpalnA</i> | <i>SpalnS</i> | <i>SpalnX</i> | <i>SpalnXL</i> |
| 0         | 4.36        | 0.23          | 0.38             | 0.38        | 0.13         | 0.28        | 0.08         | 0.08          | 0.59          | 0.07          | 0.07           |
|           | 0.00        | 0.00          | 0.00             | 0.00        | 0.00         | 0.00        | 0.00         | 0.00          | 0.00          | 0.00          | 0.00           |
| 1         | 5.95        | 0.29          | 0.73             | 0.15        | 0.12         | 0.66        | 0.12         | 0.12          | 0.61          | 0.10          | 0.10           |
|           | 0.45        | 0.14          | 0.82             | 0.07        | 0.05         | 0.16        | 0.06         | 0.07          | 0.02          | 0.05          | 0.05           |
| 2         | 7.41        | 0.31          | 0.64             | 0.18        | 0.14         | 0.96        | 0.11         | 0.13          | 0.61          | 0.10          | 0.10           |
|           | 0.39        | 0.03          | 0.24             | 0.10        | 0.08         | 0.20        | 0.03         | 0.03          | 0.02          | 0.01          | 0.01           |
| 4         | 12.19       | 0.55          | 1.24             | 0.49        | 0.39         | 2.64        | 0.26         | 0.36          | 0.66          | 0.27          | 0.27           |
|           | 0.84        | 0.09          | 0.21             | 0.13        | 0.08         | 0.40        | 0.11         | 0.14          | 0.04          | 0.08          | 0.08           |
| 6         | 16.83       | 0.86          | 2.40             | 0.84        | 0.70         | 4.18        | 0.42         | 0.57          | 0.68          | 0.40          | 0.40           |
|           | 0.96        | 0.33          | 0.73             | 0.33        | 0.25         | 0.43        | 0.23         | 0.26          | 0.03          | 0.16          | 0.17           |
| 8         | 23.70       | 1.21          | 4.75             | 1.53        | 1.33         | 6.91        | 0.56         | 0.76          | 0.70          | 0.51          | 0.51           |
|           | 1.86        | 0.28          | 1.90             | 0.36        | 0.26         | 0.84        | 0.17         | 0.22          | 0.07          | 0.10          | 0.10           |
| 10        | 33.72       | 1.69          | 6.93             | 2.62        | 2.30         | 11.32       | 0.86         | 1.23          | 0.78          | 0.77          | 0.77           |
|           | 1.41        | 0.55          | 2.30             | 0.43        | 0.32         | 0.85        | 0.28         | 0.51          | 0.07          | 0.28          | 0.29           |

Presented are the percentages of erroneously identified internal exons in alignment between 978 pairs of cDNA and genomic segments in Projector database under various levels of artificially introduced noise. Each error rate was obtained by the formula:  $100 \cdot C/T$ , where  $C$  and  $T$  denote the total numbers of correctly identified internal exons and true internal exons, respectively. Each cell indicates the average (upper line) and the standard deviation (lower line) of six experiments.

**Table S7.** Error rates at assigning terminal exons in alignment between cDNA sequences and corresponding genomic segments

| Noise (%) | Methods     |               |                  |             |              |             |              |               |               |               |                |
|-----------|-------------|---------------|------------------|-------------|--------------|-------------|--------------|---------------|---------------|---------------|----------------|
|           | <i>Blat</i> | <i>Exalin</i> | <i>Exonerate</i> | <i>Gmap</i> | <i>GmapX</i> | <i>Sim4</i> | <i>Spaln</i> | <i>SpalnA</i> | <i>SpalnS</i> | <i>SpalnX</i> | <i>SpalnXL</i> |
| 0         | 4.97        | 0.94          | 0.63             | 0.47        | 0.26         | 0.84        | 0.26         | 0.21          | 0.63          | 0.31          | 0.31           |
|           | 0.00        | 0.00          | 0.00             | 0.00        | 0.00         | 0.00        | 0.00         | 0.00          | 0.00          | 0.00          | 0.00           |
| 1         | 5.78        | 1.00          | 0.78             | 0.36        | 0.31         | 1.08        | 0.28         | 0.23          | 0.63          | 0.33          | 0.33           |
|           | 0.17        | 0.10          | 0.34             | 0.07        | 0.07         | 0.04        | 0.03         | 0.03          | 0.00          | 0.03          | 0.03           |
| 2         | 6.75        | 1.32          | 0.74             | 0.84        | 0.80         | 1.46        | 0.29         | 0.24          | 0.65          | 0.37          | 0.53           |
|           | 0.70        | 0.87          | 0.18             | 1.15        | 1.15         | 0.23        | 0.05         | 0.04          | 0.03          | 0.06          | 0.41           |
| 4         | 10.00       | 1.95          | 1.14             | 2.02        | 1.89         | 3.84        | 0.42         | 0.43          | 0.69          | 0.49          | 0.72           |
|           | 1.57        | 1.04          | 0.24             | 2.50        | 2.50         | 0.75        | 0.15         | 0.18          | 0.10          | 0.18          | 0.40           |
| 6         | 15.86       | 6.11          | 2.64             | 2.70        | 2.60         | 5.60        | 0.67         | 0.64          | 0.80          | 0.61          | 2.39           |
|           | 2.40        | 2.98          | 1.25             | 1.43        | 1.43         | 1.11        | 0.18         | 0.20          | 0.13          | 0.14          | 1.78           |
| 8         | 23.24       | 8.60          | 4.57             | 6.01        | 5.81         | 10.16       | 1.00         | 1.03          | 1.14          | 1.04          | 2.84           |
|           | 3.58        | 4.31          | 1.76             | 3.09        | 3.10         | 2.13        | 0.85         | 0.84          | 0.96          | 0.96          | 1.39           |
| 10        | 30.36       | 10.34         | 6.44             | 7.34        | 7.17         | 16.84       | 0.89         | 0.89          | 0.80          | 0.77          | 2.72           |
|           | 5.59        | 4.55          | 1.60             | 4.10        | 4.10         | 5.67        | 0.23         | 0.23          | 0.15          | 0.13          | 1.63           |

Presented are the percentages of erroneously identified terminal exons including single exons in alignment between 978 pairs of cDNA and genomic segments in Projector database under various levels of artificially introduced noise. Each error rate was obtained by the formula:  $100 \cdot C/T$ , where  $C$  and  $T$  denote the total numbers of correctly identified terminal exons and true terminal exons, respectively. Each cell indicates the average (upper line) and the standard deviation (lower line) of six experiments.

**Table S8.** Computation time (s) spent in alignments

| Noise (%) | Method      |               |                  |             |              |             |              |               |               |               |                |
|-----------|-------------|---------------|------------------|-------------|--------------|-------------|--------------|---------------|---------------|---------------|----------------|
|           | <i>Blat</i> | <i>Exalin</i> | <i>Exonerate</i> | <i>Gmap</i> | <i>GmapX</i> | <i>Sim4</i> | <i>Spaln</i> | <i>SpalnA</i> | <i>SpalnS</i> | <i>SpalnX</i> | <i>SpalnXL</i> |
| 0         | 166.6       | 4131.8        | 311.1            | 40.5        | 40.5         | 33.0        | 64.5         | 75.9          | 114.1         | 65.9          | 66.2           |
|           | 14.4        | 3.3           | 0.7              | 0.5         | 0.2          | 0.1         | 0.1          | 0.1           | 0.1           | 0.2           | 0.2            |
| 1         | 167.7       | 4135.0        | 308.4            | 41.7        | 42.1         | 33.1        | 65.8         | 77.7          | 114.6         | 66.3          | 66.5           |
|           | 18.1        | 3.3           | 0.8              | 0.2         | 0.1          | 0.2         | 0.9          | 1.5           | 0.2           | 0.3           | 0.3            |
| 2         | 170.6       | 4135.8        | 306.5            | 42.8        | 43.7         | 33.1        | 68.7         | 81.9          | 115.6         | 67.5          | 67.8           |
|           | 16.8        | 1.6           | 1.0              | 0.4         | 0.3          | 0.1         | 0.5          | 0.9           | 0.5           | 0.4           | 0.6            |
| 4         | 166.9       | 4135.5        | 304.3            | 46.4        | 48.3         | 33.4        | 78.2         | 96.4          | 120.1         | 72.2          | 72.7           |
|           | 16.9        | 1.5           | 1.8              | 0.4         | 0.4          | 0.1         | 2.6          | 4.0           | 1.0           | 1.2           | 1.6            |
| 6         | 164.1       | 4136.7        | 301.6            | 50.3        | 53.2         | 33.5        | 92.8         | 119.1         | 127.0         | 79.3          | 79.9           |
|           | 15.6        | 4.1           | 1.8              | 0.1         | 0.2          | 0.2         | 3.4          | 5.3           | 1.7           | 1.8           | 2.5            |
| 8         | 162.7       | 4135.9        | 298.4            | 53.3        | 56.4         | 33.8        | 117.8        | 158.2         | 137.6         | 90.6          | 91.0           |
|           | 13.0        | 4.2           | 3.1              | 1.6         | 1.5          | 0.3         | 2.4          | 4.0           | 3.0           | 3.3           | 3.8            |
| 10        | 159.0       | 4135.9        | 295.4            | 55.1        | 58.4         | 34.2        | 142.6        | 197.2         | 148.9         | 102.5         | 102.3          |
|           | 15.3        | 7.0           | 2.8              | 1.6         | 1.6          | 0.3         | 4.0          | 6.6           | 4.3           | 4.5           | 4.3            |

The CPU time (s) spent in alignment between 978 pairs of cDNA and genomic segments in Projector database under various levels of artificially introduced noise. Each cell indicates the average (upper line) and the standard deviation (lower line) of six experiments.



**Table S9.** Performance of three programs in genome mapping and alignment

| Observations   | Noise (%) | Methods     |             |              |               |                |
|----------------|-----------|-------------|-------------|--------------|---------------|----------------|
|                |           | <i>Blat</i> | <i>Gmap</i> | <i>Spaln</i> | <i>SpalnX</i> | <i>SpalnXL</i> |
| %Mapped        | 0         | 0.00±0.00   | 0.00±0.00   | 0.00±0.00    | 0.10±0.00     | 0.00±0.00      |
|                | 1         | 0.00±0.00   | 0.00±0.00   | 0.00±0.00    | 0.03±0.05     | 0.00±0.00      |
|                | 2         | 0.00±0.00   | 0.00±0.00   | 0.02±0.04    | 0.03±0.08     | 0.02±0.04      |
|                | 4         | 0.00±0.00   | 0.00±0.00   | 0.05±0.09    | 0.05±0.09     | 0.05±0.09      |
|                | 6         | 0.00±0.00   | 0.03±0.05   | 0.24±0.14    | 0.22±0.12     | 0.22±0.12      |
|                | 8         | 0.00±0.00   | 0.03±0.05   | 0.65±0.11    | 0.63±0.15     | 0.55±0.21      |
|                | 10        | 0.20±0.17   | 0.20±0.11   | 2.57±1.03    | 2.45±1.08     | 1.19±0.50      |
| %Gene          | 0         | 2.76±0.00   | 2.35±0.00   | 0.41±0.00    | 0.51±0.00     | 0.51±0.00      |
|                | 1         | 9.15±0.73   | 1.17±0.44   | 0.63±0.30    | 0.68±0.28     | 0.80±0.31      |
|                | 2         | 18.13±2.06  | 2.35±2.18   | 0.65±0.16    | 0.68±0.13     | 1.19±0.98      |
|                | 4         | 34.68±3.25  | 5.33±3.88   | 1.69±0.79    | 1.79±0.63     | 2.40±0.78      |
|                | 6         | 51.43±4.75  | 8.27±2.85   | 3.02±1.52    | 2.98±1.15     | 7.21±3.48      |
|                | 8         | 65.64±3.07  | 16.41±5.12  | 5.61±2.45    | 5.33±1.94     | 9.08±2.54      |
|                | 10        | 77.78±5.35  | 23.21±5.43  | 9.15±2.31    | 8.37±1.94     | 10.53±4.50     |
| %Exon          | 0         | 0.47±0.00   | 0.45±0.00   | 0.07±0.00    | 0.06±0.00     | 0.07±0.00      |
|                | 1         | 1.99±0.15   | 0.24±0.07   | 0.10±0.04    | 0.10±0.04     | 0.11±0.04      |
|                | 2         | 3.98±0.36   | 0.38±0.24   | 0.11±0.02    | 0.09±0.02     | 0.15±0.11      |
|                | 4         | 8.84±0.76   | 0.83±0.54   | 0.24±0.11    | 0.25±0.08     | 0.33±0.11      |
|                | 6         | 14.71±1.10  | 1.27±0.40   | 0.44±0.22    | 0.42±0.14     | 0.88±0.42      |
|                | 8         | 21.92±1.66  | 2.47±0.59   | 0.78±0.33    | 0.73±0.20     | 1.08±0.26      |
|                | 10        | 30.94±2.22  | 3.76±0.69   | 1.34±0.31    | 1.28±0.37     | 1.22±0.53      |
| %Internal Exon | 0         | 0.30±0.00   | 0.38±0.00   | 0.04±0.00    | 0.03±0.00     | 0.03±0.00      |
|                | 1         | 1.97±0.22   | 0.17±0.07   | 0.08±0.05    | 0.06±0.05     | 0.08±0.05      |
|                | 2         | 4.07±0.39   | 0.21±0.12   | 0.07±0.02    | 0.06±0.01     | 0.08±0.04      |
|                | 4         | 9.22±0.80   | 0.50±0.12   | 0.21±0.10    | 0.22±0.07     | 0.25±0.08      |
|                | 6         | 14.86±0.90  | 0.92±0.34   | 0.37±0.24    | 0.40±0.18     | 0.46±0.19      |
|                | 8         | 22.24±1.76  | 1.72±0.38   | 0.64±0.23    | 0.65±0.13     | 0.61±0.07      |
|                | 10        | 32.79±1.17  | 3.10±0.38   | 1.60±0.43    | 1.67±0.65     | 0.87±0.31      |
| %Terminal Exon | 0         | 1.10±0.00   | 0.63±0.00   | 0.16±0.00    | 0.16±0.00     | 0.21±0.00      |
|                | 1         | 2.00±0.14   | 0.54±0.06   | 0.19±0.04    | 0.21±0.06     | 0.24±0.04      |
|                | 2         | 3.59±0.63   | 1.04±1.13   | 0.22±0.07    | 0.20±0.06     | 0.39±0.40      |
|                | 4         | 7.33±1.78   | 2.26±2.41   | 0.30±0.14    | 0.31±0.17     | 0.58±0.44      |
|                | 6         | 14.14±2.33  | 3.11±1.57   | 0.62±0.25    | 0.54±0.15     | 2.41±1.75      |
|                | 8         | 22.08±3.85  | 6.74±2.98   | 1.27±1.10    | 1.20±0.97     | 2.90±1.38      |
|                | 10        | 29.03±6.98  | 9.37±3.60   | 1.38±0.32    | 1.32±0.31     | 2.67±1.80      |
| CPU (s)        | 0         | 503.4±0.8   | 24.9±0.3    | 35.5±0.5     | 39.8±0.4      | 39.6±0.1       |
|                | 1         | 487.2±19.1  | 24.6±1.7    | 36.9±1.2     | 42.0±1.2      | 41.3±1.0       |
|                | 2         | 474.7±12.5  | 29.9±5.2    | 43.1±4.2     | 45.9±2.5      | 44.8±2.9       |
|                | 4         | 455.9±16.7  | 39.0±3.9    | 59.5±8.3     | 56.4±6.5      | 55.5±6.3       |
|                | 6         | 432.7±18.3  | 47.0±4.9    | 82.1±16.0    | 66.6±9.6      | 66.7±10.8      |
|                | 8         | 439.3±27.8  | 54.0±7.2    | 128.8±18.1   | 91.8±14.1     | 92.0±12.3      |
|                | 10        | 412.1±24.4  | 59.2±5.5    | 191.9±57.0   | 125.1±35.3    | 121.1±33.9     |

Each cell indicates the fraction of missed genes (%Mapped), fraction of genes with incorrectly identified structures (%Gene), fraction of incorrectly identified exons (%Exon), fraction of incorrectly identified internal exons (%Internal Exon), fraction of incorrectly identified terminal exons including single exons (%Terminal Exon), and the CPU time used upon mapping and alignment of the total of 978 human and mouse CDS queries against the respective genomic sequences. The queries contain artificially introduced noise of the level indicated in the second column. The average and the standard deviation of six experiments are presented.
